# Supplementary material
Source: PubMed Central journal article supplement (PMC5258680)
Supplement: NIHMS839320-supplement.pdf [file NIHMS839320-supplement.pdf]

## Appendix Figure 1. Pubmed Search Terms

(((((((((randomized controlled trial[pt] OR controlled clinical trial[pt] OR randomized[tiab] OR placebo[tiab] OR drug therapy[sh] OR randomly[tiab] OR trial[tiab] OR groups[tiab] NOT (animals[mh] NOT humans[mh])) AND (oncologic[tiab] OR oncology[tiab] OR cancer[ti] OR cancers[ti] OR malignant[tiab] OR malignancies[tiab] OR malignancy[tiab] OR chemotherapy[tiab] OR "radiation therapy"[tiab] OR radiotherapy[tiab] OR neoplasm[tiab] OR neoplasms[tiab] OR carcinoma[tiab] OR sarcoma[ti] OR lymphoma[ti] OR leukemia[ti])) NOT medline[sb]) AND ("2010/01/01"[PDat] : "2015/12/03"[PDat]))) OR (("Medical Oncology"[Mesh] OR "Neoplasms"[Mesh] AND (Randomized Controlled Trial[ptyp] AND ("2010/01/01"[PDAT] : "2015/12/03"[PDAT])))))

## Appendix Figure 2. Selection of journals and articles

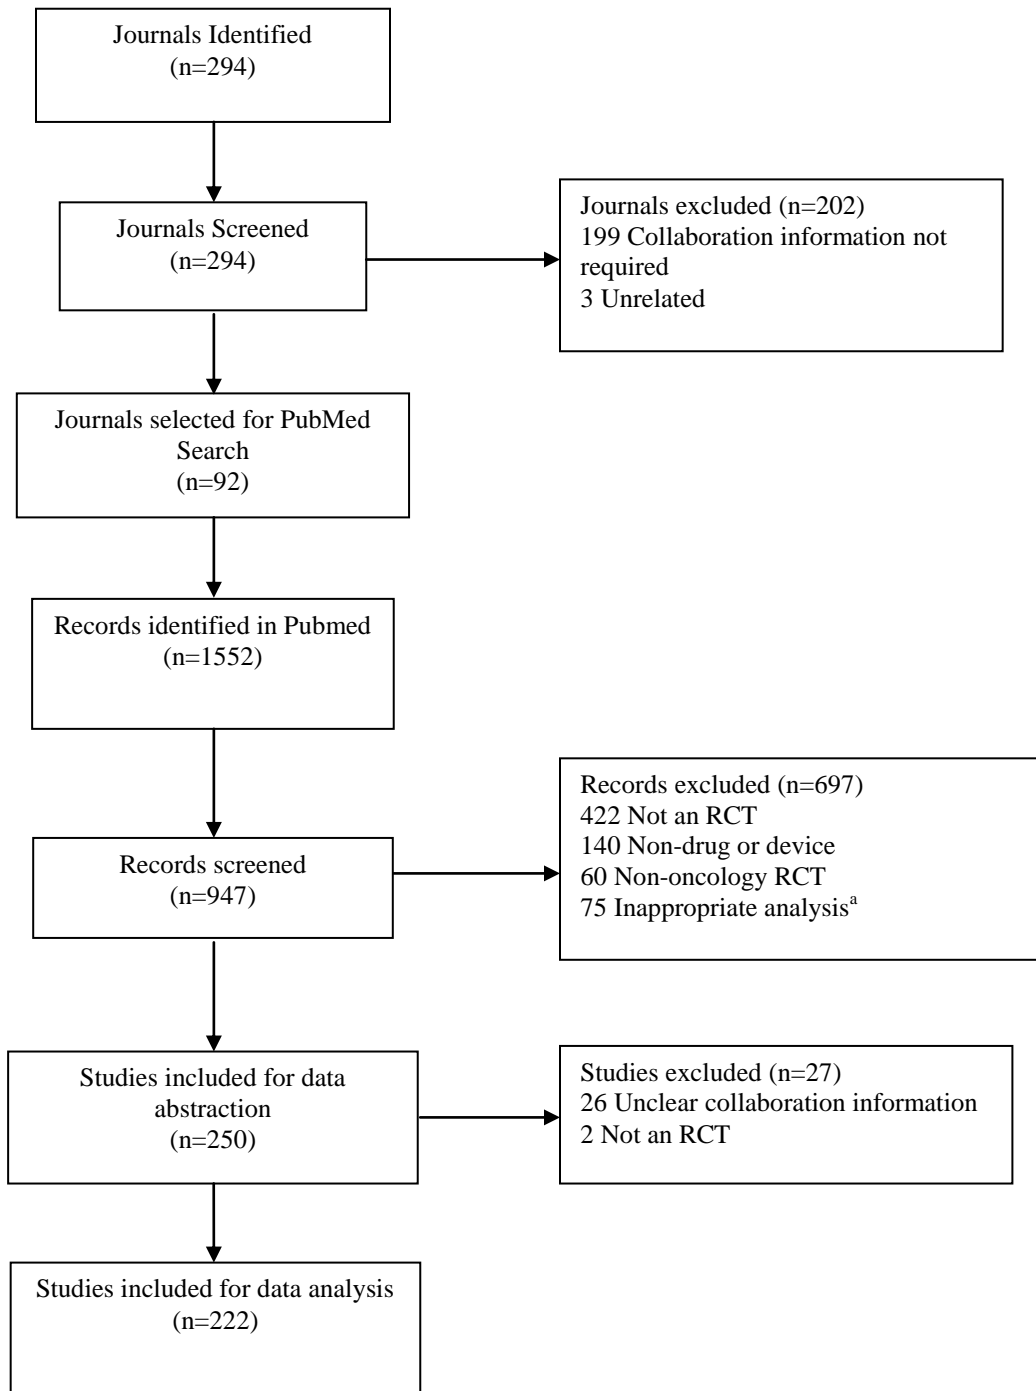

<sup>a</sup> Inappropriate analysis includes: post-hoc analyses, unplanned interim or follow-up analyses, follow-up studies evaluating the secondary endpoints of the original trial
